# Supplementary material
Source: publisher site journal article supplement (https://www.dovepress.com/article/253587)
Supplement: Supplementary file 1 [file get_supplementary_file.php]

1. **Definition about renal diseases**

Chronic kidney disease (CKD): decreased kidney function shown by glomerular filtration rate (GFR) of less than 60 mL/min per 1.73 m2, or markers of kidney damage, or both, of at least 3 months duration, regardless of the underlying cause.

Kidney failure: decreased kidney function shown by glomerular filtration rate (GFR) of less than 15 mL/min per 1.73 m2 or dialysis.

1. **Drugs and classifications**

All the drugs which were used during vancomycin treatment were classified and listed below, and other drugs not taken during the period were omitted. The classification was based Drug Classification Code of the First Affiliated Hospital, Zhejiang University School of Medicine, which was compiled referring to Anatomical Therapeutic Chemical (ATC) classification system.

- 1. Antibiotics included

2.1.1Cephalosporins (cefuroxime, cefotiam, ceftazidime, ceftriaxone, cefepime, cefotaxime, cefoxitin,  cefminox),

2.1.2 Carbapenems (meropenem,  biapenem)

2.1.3 Aminoglycosides (gentamicin, amikacin,)

2.1.4 Fluoroquinolones (moxifloxacin, levofloxacin, ofloxacin)

2.1.5 Penicillins (amoxicillin, furacilin)

2.1.6 Others (piperacillin tazobactam, cefoperazone sulbactam, imipenem cilastatin, daptomycin, tygacil, teicoplanin, linezolid, metromidazole).

- 1. Non steroidal anti-inflammatory drugs included aspirin, paracetamol, ibuprofen, flurbiprofen indomethacin, celecoxib, parecoxib, imrecoxib and diclofenac.
  2. Contrast agents included iodixanol, iohexol, iopromide, iobitridol.
  3. Antiviral agents included acyclovir, ganciclovir, entecavir, valaciclovir, tenofovir, oseltamivir, lamivudine.
  4. Antifungal agents included fluconazole, voriconazole, caspofungin and micafungin.
  5. Immunosuppressive agents included cyclosporine, tacrolimus and sirolimus.
  6. β-blockers included metoprolol, esmolol, bisoprolol, propranolol.
  7. Angiotensin II receptor antagonists included valsartan, losartan, telmisartan and irbesartan.
  8. Calcium channel blockers included amlodipine, nifedipine, nimodipine and nicardipine.

2.10Diuretics included furosemide, torasemide, spironolactone, hydrochlorothiazide.

1. **Baseline laboratory tests**

**Baseline laboratory tests** in this study included total protein, albumin, aspartate aminotransferase (AST), alanine aminotransferase (ALT), creatinine, glomerular filtration rate(GFR), fasting glucose, cystatin, white blood cell count, neutrophil count, lymphocyte count, monocyte count, platelet count, red blood cell count, hemoglobin.

**Table S1**. Potential predictors of vancomycin-associated AKI screened by univariate analysis in the derivation cohort with P＜0.1

| Variables | Total(n=341) | AKI group (n=55) | Non-AKI group (n=286) | *P* value |
| --- | --- | --- | --- | --- |
| Hypertension(n,%) | 108（31.7） | 25（45.5） | 83（29.0） | 0.016 |
| Diabetes(n,%) | 54（15.8） | 13（23.6） | 41（14.3） | 0.084 |
| Heart failure(n,%) | 22（6.5） | 8（14.5） | 14（4.9） | 0.008 |
| Arrhythmia(n,%) | 27（7.9） | 8（14.5） | 19（6.6） | 0.047 |
| Dosage adjustment(n,%) | 99（29.0） | 27（49.1） | 72（25.2） | 0.001 |
| Piperacillin/tazobactam(n,%) | 114（33.4） | 25（45.5） | 89（31.1） | 0.039 |
| Furosemide(n,%) | 201（58.9） | 46（83.6） | 155（54.2） | ＜0.001 |
| Hydrochlorothiazide(n,%) | 20（5.9） | 6（10.9） | 14（4.9） | 0.082 |
| NSAID(n,%) | 118（34.6） | 9（16.4） | 109（38.1） | 0.002 |
| Cmin (μg/ml) | 11.4±7.2 | 17.3±10.3 | 10.3±5.8 | ＜0.001 |
| Total protein(g/L) | 59.1±10.4 | 56.9±11.1 | 59.5±10.2 | 0.090 |
| Albumin(g/L) | 34.6±6.6 | 32.6±6.9 | 34.9±6.5 | 0.015 |
| Platelet Count(10E9/L) | 179.2±104.2 | 157.0±99.6 | 183.5±104.7 | 0.084 |

**
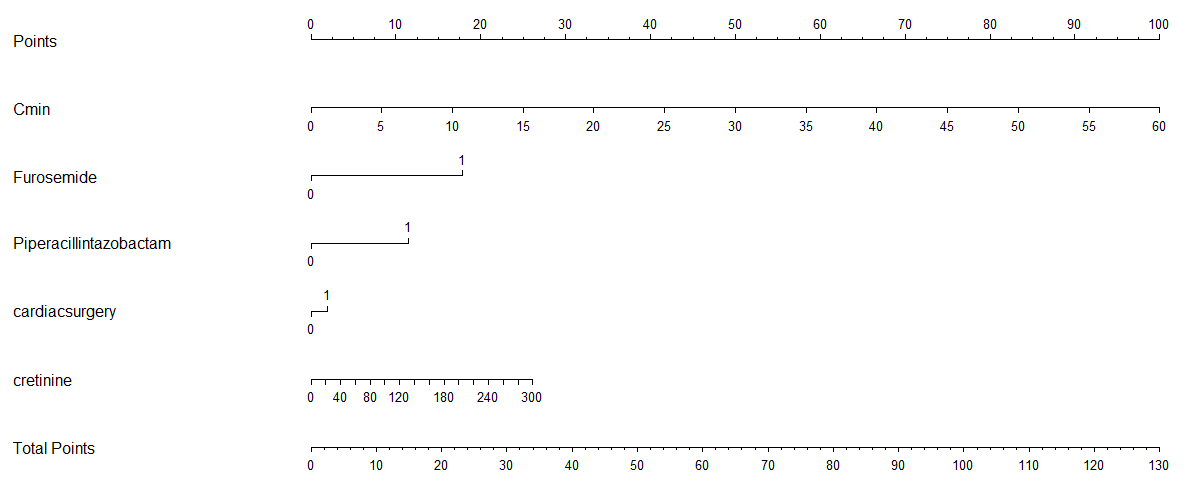
**

**Figure S1. Nomogram for the alternative model**
